# Supplementary material
Source: PubMed Central journal article supplement (PMC2614059)
Supplement: 2008.160481_1.pdf [file 2008.160481_1.pdf]

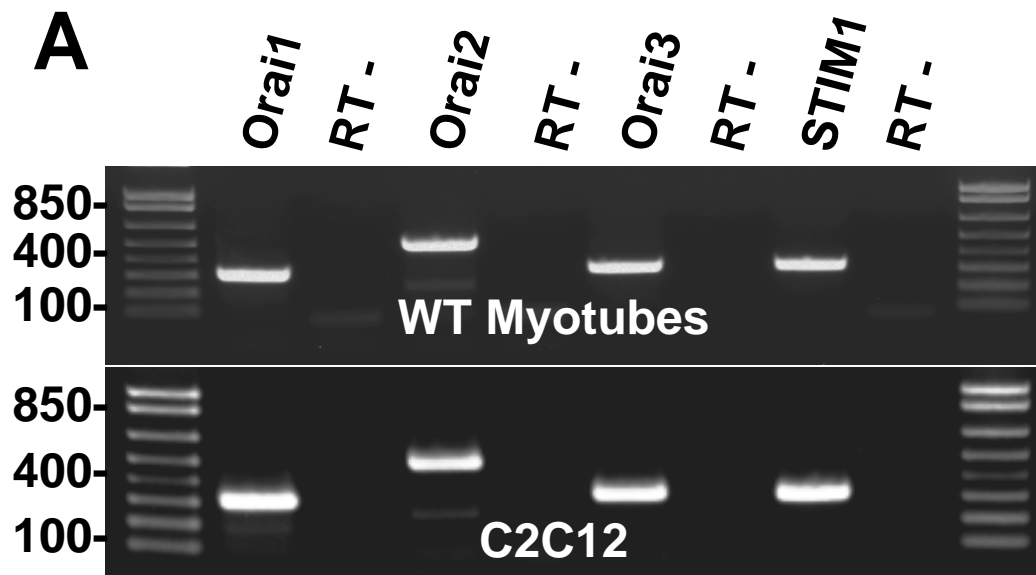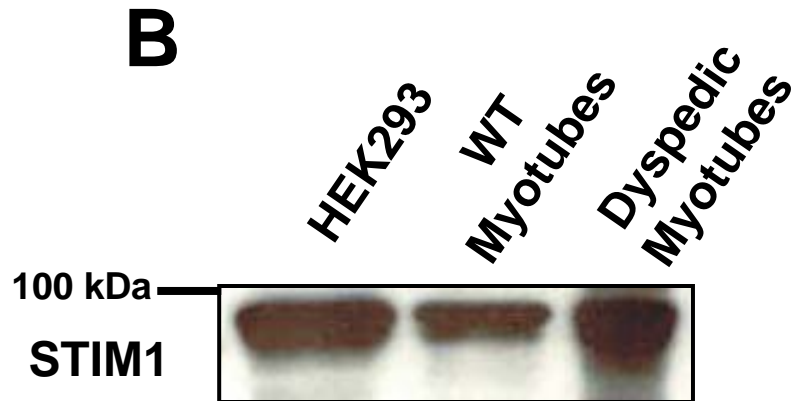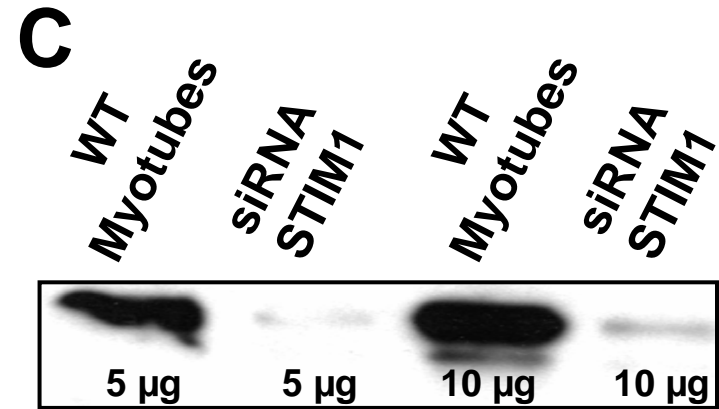

**Supplementary Figure 1. STIM1 and Orai1-3 expression in skeletal muscle cells.** *A)* Representative RT-PCR results from total RNA isolated from primary skeletal myotubes (*upper*) and C2C12 cells (*lower*) using primers specific for Orai1 (lanes 2 and 3), Orai2 (lanes 4 and 5), Orai3 (lanes 6 and 7), and STIM1 (lanes 8 and 9). Lanes 1 and 10 are standards. RT-PCR reactions were run both in the presence (lanes 2, 4, 6, and 8) and absence of reverse transcriptase (RT-; lanes 3, 5, 7, and 9) to control for potential amplification of genomic DNA. *B)* Representative STIM1 Western blot in HEK293 cells (lane 1), naïve myotubes (lane 2), and dyspedic myotubes (lane 3). *C)* Representative Western blot for STIM1 expression in parallel cultures of naïve myotubes (lanes 1 and 3) and STIM1 siRNA-transfected myotubes (lanes 2 and 4). 5  $\mu$ g of total protein was added to lanes 1 and 2 and 10  $\mu$ g of total protein was added to lanes 3 and 4. STIM1 siRNAs transfection resulted in >90% reduction in STIM1 protein.

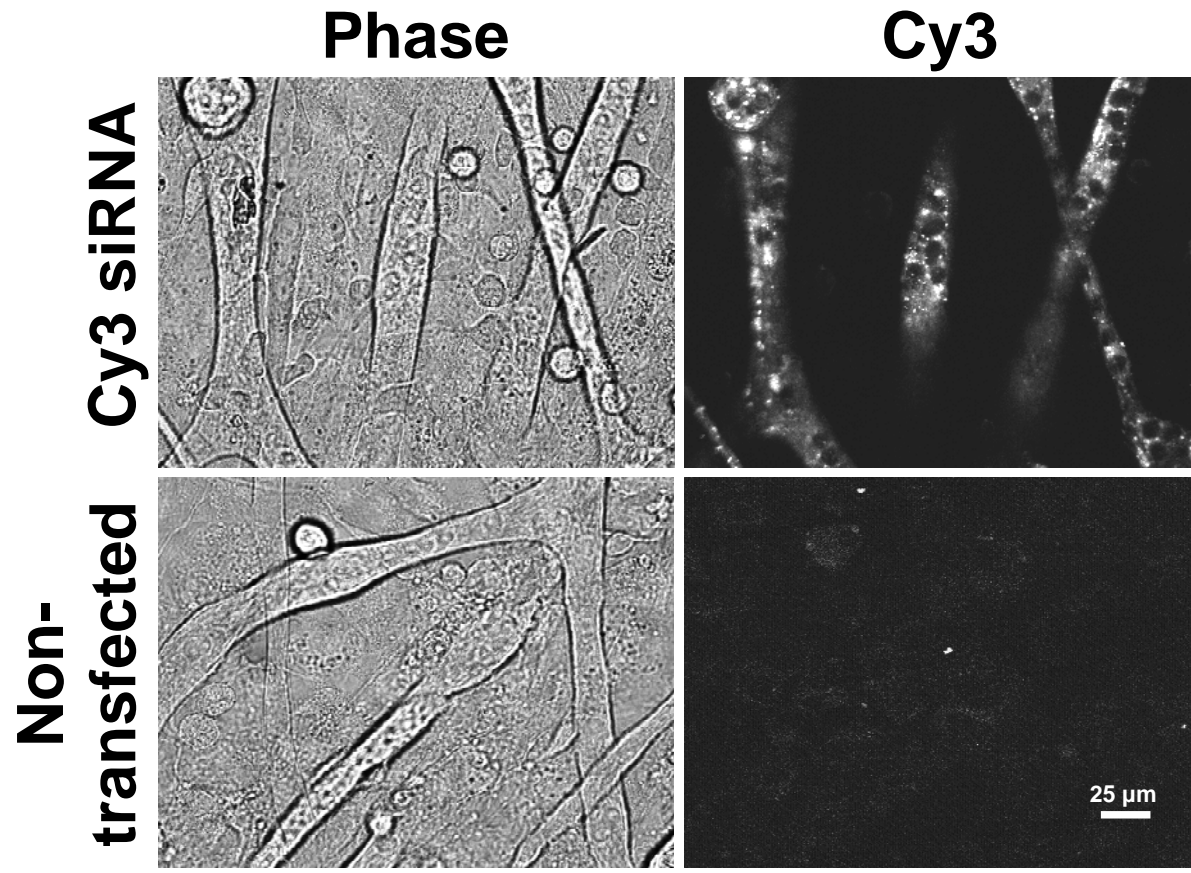

**Supplementary Figure 2. Efficiency of siRNA transfection of primary myotubes.** Representative phase (*left*) and fluorescence (*right*) micrographs of Cy3-labeled siRNA transfected (*upper*) and mock transfected (*lower*) myotubes. Approximately 100% of Cy3-transfected myotubes are fluorescent during 543 nm excitation while non-transfected myotubes are not significantly fluorescent under identical conditions.

# Supplementary Table 1

**Table 1. siRNA Sequences**

| <b>Target</b>                  | <b>siRNA sequences</b>                                                                                                                                                                                                                                                                             |
|--------------------------------|----------------------------------------------------------------------------------------------------------------------------------------------------------------------------------------------------------------------------------------------------------------------------------------------------|
| <b><i>STIM1</i></b>            | Sense: UACAGUGGCUCAUUACGUAUU<br>Antisense: 5'-P.UACGUAAUGAGCCACUGUAUU<br>Sense: GAUCGGAGCCACAGGCAGAUU<br>Antisense: 5'-P.UCUGCCUGUGGCUCCGAUCUU<br>Sense: AAACAUAGCACCUUCCAUGUU<br>Antisense: 5'-P. CAUGGAAGGUGCUAUGUUUUU<br>Sense: GAAGUAGGCAGACUAGGGUUU<br>Antisense: 5'-P. ACCCUAGUCUGCCUACUUCUU |
| <b><i>Negative Control</i></b> | Sense: 5'-UAACGACGCGACGACGUAA-3'<br>Antisense: 5'-UUACGUCGUCGCGUCGUUA-3'                                                                                                                                                                                                                           |

## Supplementary Table 2

**Table 2. Isoform-Specific STIM1 and Orai1 Primers**

| <b>Protein</b>      | <b>Primers</b>                                                 |
|---------------------|----------------------------------------------------------------|
| <b><i>STIM1</i></b> | Forward: TGGAGCTGCCACAGTATGAG<br>Reverse: CCCTCCAGATCCTTCATCA  |
| <b><i>Orai1</i></b> | Forward: GCCAGAGTTACTCCGAGGTG<br>Reverse: ACCGAGTTGAGGTTGTGGAC |
| <b><i>Orai2</i></b> | Forward: CACTGTCCTGGAGGAAGCTC<br>Reverse: CGAAGATGAGACCCACAGGT |
| <b><i>Orai3</i></b> | Forward: GCTAAGCTCAAAGCCTCCAG<br>Reverse: TTCAGCCAGGAAGAGAAAGG |
